# Supplementary material for: Effects of Deformed Wing Virus-Targeting dsRNA on Viral Loads in Bees Parasitised and Non-Parasitised by Varroa destructor
Source: MDPI journal article supplement (doi:10.3390/v15112259), 2023-11-15
Supplement: s1 [file s1]

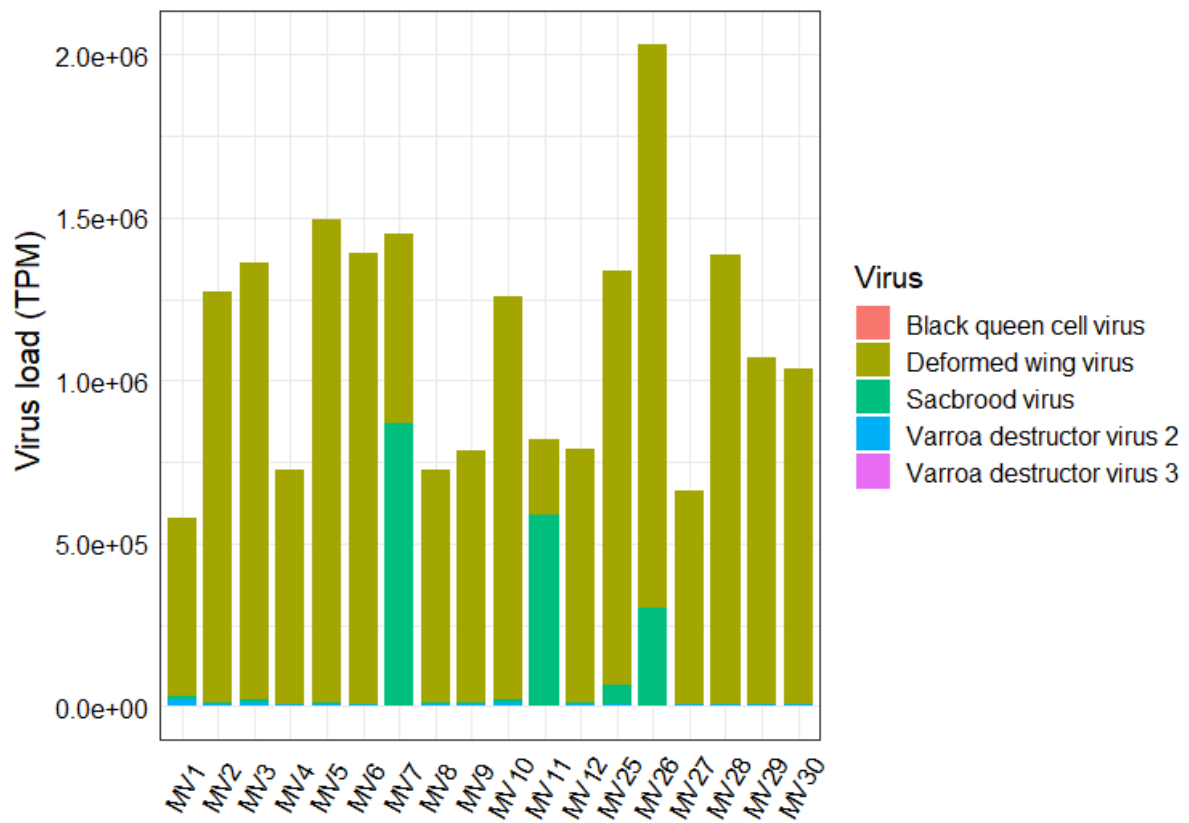

Figure S2. Relative abundance (transcripts per million; TPM) of viruses per RNA-seq varroa mite sample from each treatment; non-specific dsRNA (MV1-MV6), sugar control (MV7-MV12) and DWV-dsRNA (MV25-MV30).
