# Supplementary material for: Effects of Deformed Wing Virus-Targeting dsRNA on Viral Loads in Bees Parasitised and Non-Parasitised by Varroa destructor
Source: MDPI journal article supplement (doi:10.3390/v15112259), 2023-11-15
Supplement: s1 [file s1]

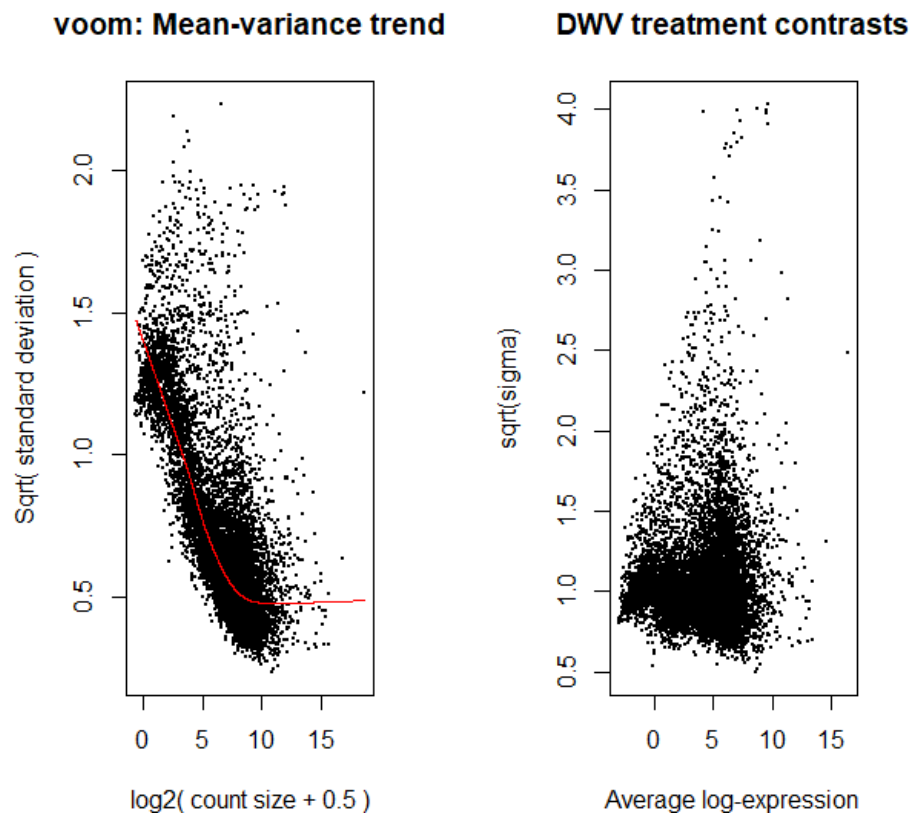

**Figure S1.** Voom output showing the mean-variance relationships for each gene (left) and linear modelling of the mean-variance relationships with contrasts investigated between control-dsRNA vs DWV-dsRNA, sugar control vs DWV-dsRNA, and sugar control vs control-dsRNA (right).
