# Supplementary material for: Effects of Deformed Wing Virus-Targeting dsRNA on Viral Loads in Bees Parasitised and Non-Parasitised by Varroa destructor
Source: MDPI journal article supplement (doi:10.3390/v15112259), 2023-11-15
Supplement: s1 [file s1]

Table S6. Deformed wing virus double-stranded RNA sequences used in mini-hive experiment.

| Double-stranded RNA | Region                       | Length (bp) | Sequence                                                                                                                                                                                                                                                                                                                                                                                                                                                                                                                                                                                                                                                                                                                                                                  | Reference                                    |
|---------------------|------------------------------|-------------|---------------------------------------------------------------------------------------------------------------------------------------------------------------------------------------------------------------------------------------------------------------------------------------------------------------------------------------------------------------------------------------------------------------------------------------------------------------------------------------------------------------------------------------------------------------------------------------------------------------------------------------------------------------------------------------------------------------------------------------------------------------------------|----------------------------------------------|
| DWV-dsRNA 1         | RNA-dependent RNA polymerase | 699         | cacctggaacatcgggtaagcgatggttgtttgacattgagctacaagactcgggatgtt<br>atctcctgcgtggaatgcgtcccgaaacttgagattcaattatcaacgacacagttaatga<br>ggaaaaagggataaaaacctcacactatattcacggattgtttgaaggatacttgtttgc<br>ctgttgaaaaatgtagaataacctggtaagactagaatatttagtataagtcggttacagt<br>ttaccataccgtttcgacagattacttagactttatggcatcctatcgagctgcacgac<br>ttaatgctgagcatggtattggtattgatgttaacagcttagagtggacaaatttggcaa<br>caagttgtctaagtatggcactcacatcgtgacaggagactataagaatttggctcctg<br>ggtagattccgatgttgcagcttcagcgttcgaaattattatcgactgggtattacatt<br>acaccgaagaagataataaagacgaaatgaagcgagtaattgtggaccatggcgcaagaga<br>tcttagcgcctagtcattctatatcgcgacttgggtgtaccgagtaccttgcggaattccat<br>caggttctccaataacggacatattgaatacaatttcaaattgtttgttaattaggttag<br>cttggttaggtattactgatttgcctttgtccgagttct | Desai et al.<br>2012; Leonard<br>et al. 2020 |
| DWV-dsRNA 2         | Helicase                     | 443         | gcatgagctagctttgcatccactctaccaatcgatataaatcggtatctaaaccaata<br>tcagattcatctaattcacgcaacggaagttcatacacacgatcatacggctctctttca<br>ctctcgattgctttaccggtgaacatttcattgtacaagtgggttcagcaactccaaagcca<br>tgcaatccttcagtaccagcaacatggatacctataattggccgttgtaaattccgagac<br>ataacctcatacaaaccatcagcgttaatacttattggagttttattattattctcgaaa<br>gccaatagctgagtatggtcgccagttactaacactccatcattctgagcacgtatatgt<br>tcattatgtgacgctataaattt                                                                                                                                                                                                                                                                                                                                                  | Leonard et al.<br>2020                       |
| DWV-dsRNA 3         | 3C-protease                  | 500         | tattcatatacaatacgaataagcctttcccgaggtttgatcgtattgctatggaagcta<br>tttatcggcgtagaaatgttttgattgaatgtaaagcgagtgaagagaagaagcgaggat<br>gcaagcattgtgagaatgatattcctattgctgaatgtagtcctaagatgttgaaagatt<br>tccatcatatcaaatttaggtatgcacatgatgtatgtaattccgagaccacatggtctg<br>aatggatgacgtataatgaatttcttgaatggataactcctgtgtatatggctaaccgtc<br>gtaaggcgaatgaatcgtttaagatgcgtgtagatgaaatgcaaagtgttacgtatggatg<br>aaccattggaaggtgataacattctcaataagtatgttgaagttaatcagcgcttagtg<br>aggaaatgaaggcatttaaggagcgtacactatggtcagatttacatcgcttaggtgcg<br>aaattagtgcgctcagttaag                                                                                                                                                                                                                      | Leonard et al.<br>2020                       |

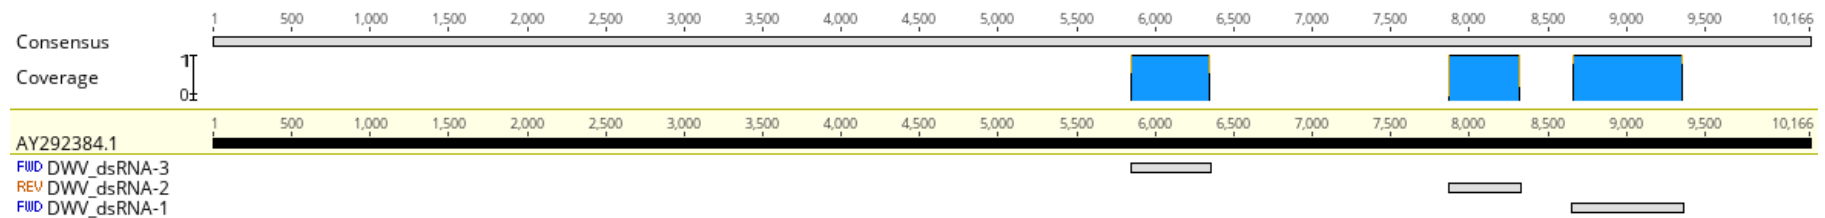

Figure S5. DWV-dsRNA sequences mapped to DWV-A reference genome (AY292384.1). used as a sequence template to design DWV-dsRNA sequences to show where in the genome the sequences target. Sequences were mapped in Geneious Prime 2020.2.3 (Biomatters, Auckland, New Zealand) where this figure was taken from.

## References

- Desai, S., et al., Reduction in Deformed wing virus infection in larval and adult honey bees (*Apis mellifera* L.) by double-stranded RNA ingestion. *Insect Molecular Biology*, 2012. 21(4): p. 446-455.
- Leonard, S.P., et al., Engineered symbionts activate honey bee immunity and limit pathogens. *Science*, 2020. 367(6477): p. 573-576.
