# Supplementary material for: Effects of Deformed Wing Virus-Targeting dsRNA on Viral Loads in Bees Parasitised and Non-Parasitised by Varroa destructor
Source: Viruses. 2023 Nov 15;15(11):2259. doi: 10.3390/v15112259 (PMC10674661; doi:10.3390/v15112259)
Supplement: Supplementary file 1 [file viruses-15-02259-s001.zip]

Archive with 9 entries (9 files):
- FigureS1.pdf
- FigureS2.pdf
- FileS1.pdf
- FileS2.pdf
- FileS3.txt
- TableS1.csv
- TableS2.csv
- TableS3.csv
- TableS4.csv
