# Supplementary material for: Effects of Deformed Wing Virus-Targeting dsRNA on Viral Loads in Bees Parasitised and Non-Parasitised by Varroa destructor
Source: Viruses. 2023 Nov 15;15(11):2259. doi: 10.3390/v15112259 (PMC10674661; doi:10.3390/v15112259)
Supplement: Supplementary file 1 [file viruses-15-02259-s001.zip › FileS3.txt]

DWV-dsRNA 3

DWV_TRINITY_DN369_c1_g1_i12 GTAAGAAAATGCGATATAACCCGGAAATATTCATATACAATACGAATAAACCTTTTCCGA  5580
DWV_dsRNA-3                 ---------------------------......................G.....C....    33
DWV_dsRNA-2 (reversed)      ------------------------------------------------------------
DWV_dsRNA-1                 ------------------------------------------------------------

DWV_TRINITY_DN369_c1_g1_i12 GGTTTGATCGTATTGCTATGGAAGCTATTTATCGGCGTAGAAATGTTTTGATTGAATGTA  5640
DWV_dsRNA-3                 ............................................................    93
DWV_dsRNA-2 (reversed)      ------------------------------------------------------------
DWV_dsRNA-1                 ------------------------------------------------------------

DWV_TRINITY_DN369_c1_g1_i12 AAGCGAGTGAAGAGAAGAAGCGAGGATGTAAGCATTGTGAGAATGATATTCCTATTGCTG  5700
DWV_dsRNA-3                 ............................C...............................   153
DWV_dsRNA-2 (reversed)      ------------------------------------------------------------
DWV_dsRNA-1                 ------------------------------------------------------------

DWV_TRINITY_DN369_c1_g1_i12 AATGTAGTCCTAAGATGTTGAAAGATTTTCATCATATTAAATTTAGGTATGCACATGATG  5760
DWV_dsRNA-3                 ............................C........C......................   213
DWV_dsRNA-2 (reversed)      ------------------------------------------------------------
DWV_dsRNA-1                 ------------------------------------------------------------

DWV_TRINITY_DN369_c1_g1_i12 TATGTAATTCCGAGACCACATGGTCTGAATGGATGACGTATAATGAATTTCTTGAATGGA  5820
DWV_dsRNA-3                 ............................................................   273
DWV_dsRNA-2 (reversed)      ------------------------------------------------------------
DWV_dsRNA-1                 ------------------------------------------------------------

DWV_TRINITY_DN369_c1_g1_i12 TAACTCCTGTGTATATGGCTAACCGTCGTAAAGCGAATGAATCGTTTAAGATGCGTGTGG  5880
DWV_dsRNA-3                 ...............................G..........................A.   333
DWV_dsRNA-2 (reversed)      ------------------------------------------------------------
DWV_dsRNA-1                 ------------------------------------------------------------

DWV_TRINITY_DN369_c1_g1_i12 ATGAAATGCAAATGTTACGTATGGATGAACCATTGGAAGGTGATAATATTCTCAATAAGT  5940
DWV_dsRNA-3                 ..............................................C.............   393
DWV_dsRNA-2 (reversed)      ------------------------------------------------------------
DWV_dsRNA-1                 ------------------------------------------------------------

DWV_TRINITY_DN369_c1_g1_i12 ATGTTGAAGTTAATCAGCGCTTAGTGGAGGAAATGAAGGCATTTAAGGAGCGTACACTAT  6000
DWV_dsRNA-3                 ............................................................   453
DWV_dsRNA-2 (reversed)      ------------------------------------------------------------
DWV_dsRNA-1                 ------------------------------------------------------------

DWV_TRINITY_DN369_c1_g1_i12 GGTCAGATTTACATCGCGTAGGTGCGGAGATTAGTGCGTCAGTTAAGAAAGCTTTACCAA  6060
DWV_dsRNA-3                 .................T..........A..................-------------   513
DWV_dsRNA-2 (reversed)      ------------------------------------------------------------
DWV_dsRNA-1                 ------------------------------------------------------------

DWV-dsRNA 2

DWV_TRINITY_DN369_c1_g1_i12 GTAAGAGCATTATTAAATTTATAGCGTCACATAATGAACATATACGTGCTCAGAATGATG  7620
DWV_dsRNA-3                 ------------------------------------------------------------  2073
DWV_dsRNA-2 (reversed)      --------------..............................................    46
DWV_dsRNA-1                 ------------------------------------------------------------

DWV_TRINITY_DN369_c1_g1_i12 GAGTGTTAGTAACTGGCGACCATACTCAGCTATTGGCTTTCGAGAATAATAATAAGACTC  7680
DWV_dsRNA-3                 ------------------------------------------------------------  2133
DWV_dsRNA-2 (reversed)      .......................................................A....   106
DWV_dsRNA-1                 ------------------------------------------------------------

DWV_TRINITY_DN369_c1_g1_i12 CAATAAGTATCAACGCTGATGGTTTGTATGAGGTTATACTTCAAGGAGTATATACTTATC  7740
DWV_dsRNA-3                 ------------------------------------------------------------  2193
DWV_dsRNA-2 (reversed)      ..........T............................................C....   166
DWV_dsRNA-1                 ------------------------------------------------------------

DWV_TRINITY_DN369_c1_g1_i12 CATACCATGGCGATGGTGTTTGTGGTTCGATATTGCTGTCTCGGAATTTGCAACGGCCAA  7800
DWV_dsRNA-3                 ------------------------------------------------------------  2253
DWV_dsRNA-2 (reversed)      .......C...........................T.............A..........   226
DWV_dsRNA-1                 ------------------------------------------------------------

DWV_TRINITY_DN369_c1_g1_i12 TTATAGGTATCCATGTTGCTGGTACTGAAGGATTGCATGGCTTTGGAGTTGCTGAACCAC  7860
DWV_dsRNA-3                 ------------------------------------------------------------  2313
DWV_dsRNA-2 (reversed)      ............................................................   286
DWV_dsRNA-1                 ------------------------------------------------------------

DWV_TRINITY_DN369_c1_g1_i12 TGGTACATGAAATGTTCACTGGTAAAGCAATCGAGAGTGAAAGAGAGCCGTATGATCGTG  7920
DWV_dsRNA-3                 ------------------------------------------------------------  2373
DWV_dsRNA-2 (reversed)      .T.................C........................................   346
DWV_dsRNA-1                 ------------------------------------------------------------

DWV_TRINITY_DN369_c1_g1_i12 TGTATGAACTTCCGTTGCGTGAATTAGATGAATCTGATATTGGTTTAGATACTGATTTAT  7980
DWV_dsRNA-3                 ------------------------------------------------------------  2433
DWV_dsRNA-2 (reversed)      ....................................................C.......   406
DWV_dsRNA-1                 ------------------------------------------------------------

DWV_TRINITY_DN369_c1_g1_i12 ATCCGATTGGTAGAGTGGATGCAAAGTTAGCTCATGCTCAAAGCCCTTCTACTGGGATCA  8040
DWV_dsRNA-3                 ------------------------------------------------------------  2493
DWV_dsRNA-2 (reversed)      ..........................C..........-----------------------   466
DWV_dsRNA-1                 ------------------------------------------------------------

DWV-dsRNA 1

DWV_TRINITY_DN369_c1_g1_i12 CTTTGTCTTCATTAAAGCCACCTGGAACATCAGGTAAGCGATGGTTGTTTGACATTGAGC  8400
DWV_dsRNA-3                 ------------------------------------------------------------  2853
DWV_dsRNA-2 (reversed)      ------------------------------------------------------------   826
DWV_dsRNA-1                 ------------------.............G............................    42

DWV_TRINITY_DN369_c1_g1_i12 TACAAGACTCGGGATGTTATCTCCTGCGTGGAATGCGTCCCGAACTTGAGATTCAATTAT  8460
DWV_dsRNA-3                 ------------------------------------------------------------  2913
DWV_dsRNA-2 (reversed)      ------------------------------------------------------------   886
DWV_dsRNA-1                 ............................................................   102

DWV_TRINITY_DN369_c1_g1_i12 CAACGACACAGTTAATGAGGAAAAAGGGAATAAAACCTCACACTATATTCACGGATTGTT  8520
DWV_dsRNA-3                 ------------------------------------------------------------  2973
DWV_dsRNA-2 (reversed)      ------------------------------------------------------------   946
DWV_dsRNA-1                 ............................................................   162

DWV_TRINITY_DN369_c1_g1_i12 TGAAAGATACTTGTTTGCCTGTTGAAAAATGTAGAATACCTGGTAAGACTAGAATATTTA  8580
DWV_dsRNA-3                 ------------------------------------------------------------  3033
DWV_dsRNA-2 (reversed)      ------------------------------------------------------------  1006
DWV_dsRNA-1                 ....G.......................................................   222

DWV_TRINITY_DN369_c1_g1_i12 GTATAAGTCCGGTACAGTTTACCATACCGTTTCGACAGTATTATTTAGACTTTATGGCAT  8640
DWV_dsRNA-3                 ------------------------------------------------------------  3093
DWV_dsRNA-2 (reversed)      ------------------------------------------------------------  1066
DWV_dsRNA-1                 ...........................................C................   282

DWV_TRINITY_DN369_c1_g1_i12 CCTATCGCGCTGCACGACTTAATGCTGAGCATGGTATTGGTATTGATGTTAACAGCTTAG  8700
DWV_dsRNA-3                 ------------------------------------------------------------  3153
DWV_dsRNA-2 (reversed)      ------------------------------------------------------------  1126
DWV_dsRNA-1                 .......A....................................................   342

DWV_TRINITY_DN369_c1_g1_i12 AGTGGACAAATTTGGCAACAAGGTTGTCTAAGTATGGCACTCACATCGTGACAGGAGACT  8760
DWV_dsRNA-3                 ------------------------------------------------------------  3213
DWV_dsRNA-2 (reversed)      ------------------------------------------------------------  1186
DWV_dsRNA-1                 ............................................................   402

DWV_TRINITY_DN369_c1_g1_i12 ATAAGAATTTTGGTCCTGGGTTAGATTCCGATGTTGCAGCTTCAGCGTTCGAAATTATTA  8820
DWV_dsRNA-3                 ------------------------------------------------------------  3273
DWV_dsRNA-2 (reversed)      ------------------------------------------------------------  1246
DWV_dsRNA-1                 ............................................................   462

DWV_TRINITY_DN369_c1_g1_i12 TCGACTGGGTATTACATTACACCGAGGAAGATAATAAAGACGAAATGAAGCGAGTAATGT  8880
DWV_dsRNA-3                 ------------------------------------------------------------  3333
DWV_dsRNA-2 (reversed)      ------------------------------------------------------------  1306
DWV_dsRNA-1                 .........................A..................................   522

DWV_TRINITY_DN369_c1_g1_i12 GGACCATGGCGCAAGAAATCTTAGCGCCTAGTCATCTATGTCGCGACTTGGTGTACCGAG  8940
DWV_dsRNA-3                 ------------------------------------------------------------  3393
DWV_dsRNA-2 (reversed)      ------------------------------------------------------------  1366
DWV_dsRNA-1                 ................G......................A....................   582

DWV_TRINITY_DN369_c1_g1_i12 TACCTTGTGGAATTCCATCAGGTTCTCCAATAACGGACATATTGAACACAATTTCAAATT  9000
DWV_dsRNA-3                 ------------------------------------------------------------  3453
DWV_dsRNA-2 (reversed)      ------------------------------------------------------------  1426
DWV_dsRNA-1                 .......C......................................T.............   642

DWV_TRINITY_DN369_c1_g1_i12 GTTTGTTAATTAGGTTAGCTTGGTTAGGTATTACTGACTTGCCTTTGTCCGAGTTCTCTC  9060
DWV_dsRNA-3                 ------------------------------------------------------------  3513
DWV_dsRNA-2 (reversed)      ------------------------------------------------------------  1486
DWV_dsRNA-1                 .....................................T...................---   702

DWV_TRINITY_DN369_c1_g1_i12 AAAATGTTGTTCTTGTCTGTTATGGCGACGATCTTATCATGAATGTTAGTGATAACATGA  9120
DWV_dsRNA-3                 ------------------------------------------------------------  3573
DWV_dsRNA-2 (reversed)      ------------------------------------------------------------  1546
DWV_dsRNA-1                 ------------------------------------------------------------   762

DWV_TRINITY_DN369_c1_g1_i12 TTGATAAGTTTAATGCCGTGACGATAGGAAAATTCTTTTCACAATATAAGATGGAATTTA  9180
DWV_dsRNA-3                 ------------------------------------------------------------  3633
DWV_dsRNA-2 (reversed)      ------------------------------------------------------------  1606
DWV_dsRNA-1                 ------------------------------------------------------------   822

DWV_TRINITY_DN369_c1_g1_i12 CGGATCAGGATAAATCAGGAAATACTGTAAAGTGGCGGACGTT                   9223
DWV_dsRNA-3                 -------------------------------------------                    500
DWV_dsRNA-2 (reversed)      -------------------------------------------                    443
DWV_dsRNA-1                 -------------------------------------------                    699
