# Supplementary material for: Effects of Deformed Wing Virus-Targeting dsRNA on Viral Loads in Bees Parasitised and Non-Parasitised by Varroa destructor
Source: Viruses. 2023 Nov 15;15(11):2259. doi: 10.3390/v15112259 (PMC10674661; doi:10.3390/v15112259)
Supplement: Supplementary file 1 [file viruses-15-02259-s001.zip › TableS1.csv]

Sample	Target	DWVCt	Treatment	Parasitism
Sample 1	DWV	27.766	dsRNA control	Parasitised- normal wings
Sample 1	NDUFA8	19.633	dsRNA control	Parasitised- normal wings
Sample 1	PROS54	21.521	dsRNA control	Parasitised- normal wings
Sample 2	DWV	21.438	dsRNA control	Parasitised- normal wings
Sample 2	NDUFA8	19.694	dsRNA control	Parasitised- normal wings
Sample 2	PROS54	21.732	dsRNA control	Parasitised- normal wings
Sample 3	DWV	19.935	dsRNA control	Parasitised- deformed wings
Sample 3	NDUFA8	19.663	dsRNA control	Parasitised- deformed wings
Sample 3	PROS54	22.666	dsRNA control	Parasitised- deformed wings
Sample 4	DWV	12.43	dsRNA control	Parasitised- deformed wings
Sample 4	NDUFA8	23.281	dsRNA control	Parasitised- deformed wings
Sample 4	PROS54	27.297	dsRNA control	Parasitised- deformed wings
Sample 5	DWV	8.087	dsRNA control	Parasitised- normal wings
Sample 5	NDUFA8	22.167	dsRNA control	Parasitised- normal wings
Sample 5	PROS54	23.021	dsRNA control	Parasitised- normal wings
Sample 6	DWV	8.67	dsRNA control	Parasitised- normal wings
Sample 6	NDUFA8	22.795	dsRNA control	Parasitised- normal wings
Sample 6	PROS54	23.757	dsRNA control	Parasitised- normal wings
Sample 7	DWV	27.734	dsRNA control	Non-parasitised
Sample 7	NDUFA8	22.411	dsRNA control	Non-parasitised
Sample 7	PROS54	23.177	dsRNA control	Non-parasitised
Sample 8	DWV	23.547	dsRNA control	Non-parasitised
Sample 8	NDUFA8	21.462	dsRNA control	Non-parasitised
Sample 8	PROS54	23.012	dsRNA control	Non-parasitised
Sample 9	DWV	9.888	dsRNA control	Parasitised- deformed wings
Sample 9	NDUFA8	22.21	dsRNA control	Parasitised- deformed wings
Sample 9	PROS54	23.327	dsRNA control	Parasitised- deformed wings
Sample 10	DWV	8.607	dsRNA control	Parasitised- deformed wings
Sample 10	NDUFA8	21.955	dsRNA control	Parasitised- deformed wings
Sample 10	PROS54	23.386	dsRNA control	Parasitised- deformed wings
Sample 11	DWV	21.876	dsRNA control	Parasitised- normal wings
Sample 11	NDUFA8	20.06	dsRNA control	Parasitised- normal wings
Sample 11	PROS54	21.504	dsRNA control	Parasitised- normal wings
Sample 12	DWV	25.096	dsRNA control	Parasitised- normal wings
Sample 12	NDUFA8	21.465	dsRNA control	Parasitised- normal wings
Sample 12	PROS54	22.828	dsRNA control	Parasitised- normal wings
Sample 13	DWV	24.09	dsRNA control	Non-parasitised
Sample 13	NDUFA8	20.804	dsRNA control	Non-parasitised
Sample 13	PROS54	22.739	dsRNA control	Non-parasitised
Sample 14	DWV	25.297	dsRNA control	Non-parasitised
Sample 14	NDUFA8	21.231	dsRNA control	Non-parasitised
Sample 14	PROS54	23.144	dsRNA control	Non-parasitised
Sample 15	DWV	9.955	dsRNA control	Parasitised- deformed wings
Sample 15	NDUFA8	22.128	dsRNA control	Parasitised- deformed wings
Sample 15	PROS54	23.848	dsRNA control	Parasitised- deformed wings
Sample 16	DWV	23.559	dsRNA control	Parasitised- deformed wings
Sample 16	NDUFA8	26.58	dsRNA control	Parasitised- deformed wings
Sample 16	PROS54	25.846	dsRNA control	Parasitised- deformed wings
Sample 17	DWV	23.76	dsRNA control	Parasitised- normal wings
Sample 17	NDUFA8	29.475	dsRNA control	Parasitised- normal wings
Sample 17	PROS54	11.997	dsRNA control	Parasitised- normal wings
Sample 18	DWV	24.036	dsRNA control	Parasitised- normal wings
Sample 18	NDUFA8	23.068	dsRNA control	Parasitised- normal wings
Sample 18	PROS54	11.046	dsRNA control	Parasitised- normal wings
Sample 19	DWV	22.966	dsRNA control	Non-parasitised
Sample 19	NDUFA8	23.824	dsRNA control	Non-parasitised
Sample 19	PROS54	26.484	dsRNA control	Non-parasitised
Sample 20	DWV	22.516	dsRNA control	Non-parasitised
Sample 20	NDUFA8	20.669	dsRNA control	Non-parasitised
Sample 20	PROS54	26.457	dsRNA control	Non-parasitised
Sample 21	DWV	22.475	Control sugar	Parasitised- normal wings
Sample 21	NDUFA8	21.062	Control sugar	Parasitised- normal wings
Sample 21	PROS54	23.997	Control sugar	Parasitised- normal wings
Sample 22	DWV	22.975	Control sugar	Parasitised- normal wings
Sample 22	NDUFA8	31.024	Control sugar	Parasitised- normal wings
Sample 22	PROS54	17.911	Control sugar	Parasitised- normal wings
Sample 23	DWV	22.545	Control sugar	Non-parasitised
Sample 23	NDUFA8	32.043	Control sugar	Non-parasitised
Sample 23	PROS54	35.401	Control sugar	Non-parasitised
Sample 24	DWV	24.199	Control sugar	Non-parasitised
Sample 24	NDUFA8	23.621	Control sugar	Non-parasitised
Sample 24	PROS54	35.904	Control sugar	Non-parasitised
Sample 25	DWV	22.618	Control sugar	Parasitised- deformed wings
Sample 25	NDUFA8	24.228	Control sugar	Parasitised- deformed wings
Sample 25	PROS54	26.097	Control sugar	Parasitised- deformed wings
Sample 26	DWV	23.107	Control sugar	Parasitised- deformed wings
Sample 26	NDUFA8	21.101	Control sugar	Parasitised- deformed wings
Sample 26	PROS54	10.548	Control sugar	Parasitised- deformed wings
Sample 27	DWV	24	Control sugar	Parasitised- deformed wings
Sample 27	NDUFA8	21.847	Control sugar	Parasitised- deformed wings
Sample 27	PROS54	10.456	Control sugar	Parasitised- deformed wings
Sample 28	DWV	20.504	Control sugar	Non-parasitised
Sample 28	NDUFA8	22.327	Control sugar	Non-parasitised
Sample 28	PROS54	22.181	Control sugar	Non-parasitised
Sample 29	DWV	20.124	Control sugar	Parasitised- normal wings
Sample 29	NDUFA8	22.646	Control sugar	Parasitised- normal wings
Sample 29	PROS54	21.411	Control sugar	Parasitised- normal wings
Sample 30	DWV	20.918	Control sugar	Parasitised- normal wings
Sample 30	NDUFA8	20.86	Control sugar	Parasitised- normal wings
Sample 30	PROS54	21.692	Control sugar	Parasitised- normal wings
Sample 31	DWV	21.984	Control sugar	Non-parasitised
Sample 31	NDUFA8	21.192	Control sugar	Non-parasitised
Sample 31	PROS54	20.802	Control sugar	Non-parasitised
Sample 32	DWV	24.633	Control sugar	Non-parasitised
Sample 32	NDUFA8	20.54	Control sugar	Non-parasitised
Sample 32	PROS54	22.792	Control sugar	Non-parasitised
Sample 33	DWV	11.509	Control sugar	Parasitised- deformed wings
Sample 33	NDUFA8	23.744	Control sugar	Parasitised- deformed wings
Sample 33	PROS54	25.248	Control sugar	Parasitised- deformed wings
Sample 34	DWV	10.66	Control sugar	Parasitised- deformed wings
Sample 34	NDUFA8	22.688	Control sugar	Parasitised- deformed wings
Sample 34	PROS54	24.515	Control sugar	Parasitised- deformed wings
Sample 35	DWV	21.322	Control sugar	Parasitised- normal wings
Sample 35	NDUFA8	20.97	Control sugar	Parasitised- normal wings
Sample 35	PROS54	22.913	Control sugar	Parasitised- normal wings
Sample 36	DWV	32.706	Control sugar	Parasitised- normal wings
Sample 36	NDUFA8	23.766	Control sugar	Parasitised- normal wings
Sample 36	PROS54	25.212	Control sugar	Parasitised- normal wings
Sample 37	DWV	32.573	Control sugar	Non-parasitised
Sample 37	NDUFA8	21.134	Control sugar	Non-parasitised
Sample 37	PROS54	23.239	Control sugar	Non-parasitised
Sample 38	DWV	30.429	Control sugar	Non-parasitised
Sample 38	NDUFA8	21.413	Control sugar	Non-parasitised
Sample 38	PROS54	23.485	Control sugar	Non-parasitised
Sample 39	DWV	12.653	Control sugar	Parasitised- deformed wings
Sample 39	NDUFA8	24.469	Control sugar	Parasitised- deformed wings
Sample 39	PROS54	26.06	Control sugar	Parasitised- deformed wings
Sample 40	DWV	19.306	Control sugar	Parasitised- deformed wings
Sample 40	NDUFA8	21.633	Control sugar	Parasitised- deformed wings
Sample 40	PROS54	23.472	Control sugar	Parasitised- deformed wings
Sample 41	DWV	12.059	Varroa dsRNA low	Parasitised- normal wings
Sample 41	NDUFA8	25.197	Varroa dsRNA low	Parasitised- normal wings
Sample 41	PROS54	25.539	Varroa dsRNA low	Parasitised- normal wings
Sample 42	DWV	27.465	Varroa dsRNA low	Parasitised- normal wings
Sample 42	NDUFA8	21.061	Varroa dsRNA low	Parasitised- normal wings
Sample 42	PROS54	23.104	Varroa dsRNA low	Parasitised- normal wings
Sample 43	DWV	30.254	Varroa dsRNA low	Parasitised- deformed wings
Sample 43	NDUFA8	21.016	Varroa dsRNA low	Parasitised- deformed wings
Sample 43	PROS54	23.242	Varroa dsRNA low	Parasitised- deformed wings
Sample 44	DWV	32.58	Varroa dsRNA low	Parasitised- deformed wings
Sample 44	NDUFA8	21.758	Varroa dsRNA low	Parasitised- deformed wings
Sample 44	PROS54	23.45	Varroa dsRNA low	Parasitised- deformed wings
Sample 45	DWV	9.535	Varroa dsRNA low	Parasitised- normal wings
Sample 45	NDUFA8	21.097	Varroa dsRNA low	Parasitised- normal wings
Sample 45	PROS54	23.134	Varroa dsRNA low	Parasitised- normal wings
Sample 46	DWV	25.471	Varroa dsRNA low	Parasitised- normal wings
Sample 46	NDUFA8	20.412	Varroa dsRNA low	Parasitised- normal wings
Sample 46	PROS54	22.168	Varroa dsRNA low	Parasitised- normal wings
Sample 47	DWV	25.484	Varroa dsRNA low	Non-parasitised
Sample 47	NDUFA8	21.26	Varroa dsRNA low	Non-parasitised
Sample 47	PROS54	23.202	Varroa dsRNA low	Non-parasitised
Sample 48	DWV	29.193	Varroa dsRNA low	Non-parasitised
Sample 48	NDUFA8	21.575	Varroa dsRNA low	Non-parasitised
Sample 48	PROS54	23.441	Varroa dsRNA low	Non-parasitised
Sample 49	DWV	11.792	Varroa dsRNA low	Parasitised- deformed wings
Sample 49	NDUFA8	23.486	Varroa dsRNA low	Parasitised- deformed wings
Sample 49	PROS54	25.449	Varroa dsRNA low	Parasitised- deformed wings
Sample 50	DWV	9.941	Varroa dsRNA low	Parasitised- deformed wings
Sample 50	NDUFA8	21.52	Varroa dsRNA low	Parasitised- deformed wings
Sample 50	PROS54	23.696	Varroa dsRNA low	Parasitised- deformed wings
Sample 51	DWV	25.454	Varroa dsRNA low	Non-parasitised
Sample 51	NDUFA8	20.442	Varroa dsRNA low	Non-parasitised
Sample 51	PROS54	22.946	Varroa dsRNA low	Non-parasitised
Sample 52	DWV	31.571	Varroa dsRNA low	Non-parasitised
Sample 52	NDUFA8	21.282	Varroa dsRNA low	Non-parasitised
Sample 52	PROS54	23.704	Varroa dsRNA low	Non-parasitised
Sample 53	DWV	29.803	Varroa dsRNA low	Parasitised- normal wings
Sample 53	NDUFA8	22.463	Varroa dsRNA low	Parasitised- normal wings
Sample 53	PROS54	24.855	Varroa dsRNA low	Parasitised- normal wings
Sample 54	DWV	31.53	Varroa dsRNA low	Parasitised- normal wings
Sample 54	NDUFA8	21.835	Varroa dsRNA low	Parasitised- normal wings
Sample 54	PROS54	24.086	Varroa dsRNA low	Parasitised- normal wings
Sample 55	DWV	35.26	Varroa dsRNA low	Non-parasitised
Sample 55	NDUFA8	26.387	Varroa dsRNA low	Non-parasitised
Sample 55	PROS54	28.25	Varroa dsRNA low	Non-parasitised
Sample 56	DWV	34.481	Varroa dsRNA low	Non-parasitised
Sample 56	NDUFA8	25.248	Varroa dsRNA low	Non-parasitised
Sample 56	PROS54	27.274	Varroa dsRNA low	Non-parasitised
Sample 57	DWV	9.995	Varroa dsRNA low	Parasitised- deformed wings
Sample 57	NDUFA8	22.765	Varroa dsRNA low	Parasitised- deformed wings
Sample 57	PROS54	25.24	Varroa dsRNA low	Parasitised- deformed wings
Sample 58	DWV	9.994	Varroa dsRNA low	Parasitised- deformed wings
Sample 58	NDUFA8	22.284	Varroa dsRNA low	Parasitised- deformed wings
Sample 58	PROS54	24.719	Varroa dsRNA low	Parasitised- deformed wings
Sample 59	DWV	31.407	Varroa dsRNA low	Parasitised- normal wings
Sample 59	NDUFA8	22.952	Varroa dsRNA low	Parasitised- normal wings
Sample 59	PROS54	25.194	Varroa dsRNA low	Parasitised- normal wings
Sample 60	DWV	12.654	Varroa dsRNA low	Parasitised- normal wings
Sample 60	NDUFA8	23.283	Varroa dsRNA low	Parasitised- normal wings
Sample 60	PROS54	25.423	Varroa dsRNA low	Parasitised- normal wings
Sample 61	DWV	11.159	Varroa dsRNA low	Non-parasitised
Sample 61	NDUFA8	22.453	Varroa dsRNA low	Non-parasitised
Sample 61	PROS54	24.67	Varroa dsRNA low	Non-parasitised
Sample 62	DWV	15.692	Varroa dsRNA low	Non-parasitised
Sample 62	NDUFA8	24.086	Varroa dsRNA low	Non-parasitised
Sample 62	PROS54	26.129	Varroa dsRNA low	Non-parasitised
Sample 63	DWV	29.346	Varroa dsRNA low	Parasitised- deformed wings
Sample 63	NDUFA8	23.46	Varroa dsRNA low	Parasitised- deformed wings
Sample 63	PROS54	25.587	Varroa dsRNA low	Parasitised- deformed wings
Sample 64	DWV	10.805	Varroa dsRNA low	Parasitised- deformed wings
Sample 64	NDUFA8	22.764	Varroa dsRNA low	Parasitised- deformed wings
Sample 64	PROS54	24.43	Varroa dsRNA low	Parasitised- deformed wings
Sample 65	DWV	24.535	Varroa dsRNA high	Parasitised- normal wings
Sample 65	NDUFA8	21.782	Varroa dsRNA high	Parasitised- normal wings
Sample 65	PROS54	24.019	Varroa dsRNA high	Parasitised- normal wings
Sample 66	DWV	29.063	Varroa dsRNA high	Parasitised- normal wings
Sample 66	NDUFA8	22.877	Varroa dsRNA high	Parasitised- normal wings
Sample 66	PROS54	24.831	Varroa dsRNA high	Parasitised- normal wings
Sample 67	DWV	28.973	Varroa dsRNA high	Non-parasitised
Sample 67	NDUFA8	23.829	Varroa dsRNA high	Non-parasitised
Sample 67	PROS54	25.776	Varroa dsRNA high	Non-parasitised
Sample 68	DWV	30.63	Varroa dsRNA high	Non-parasitised
Sample 68	NDUFA8	20.719	Varroa dsRNA high	Non-parasitised
Sample 68	PROS54	23.481	Varroa dsRNA high	Non-parasitised
Sample 69	DWV	24.954	Varroa dsRNA high	Parasitised- deformed wings
Sample 69	NDUFA8	22.302	Varroa dsRNA high	Parasitised- deformed wings
Sample 69	PROS54	24.096	Varroa dsRNA high	Parasitised- deformed wings
Sample 70	DWV	11.888	Varroa dsRNA high	Parasitised- deformed wings
Sample 70	NDUFA8	24.181	Varroa dsRNA high	Parasitised- deformed wings
Sample 70	PROS54	25.913	Varroa dsRNA high	Parasitised- deformed wings
Sample 71	DWV	12.297	Varroa dsRNA high	Parasitised- normal wings
Sample 71	NDUFA8	23.975	Varroa dsRNA high	Parasitised- normal wings
Sample 71	PROS54	24.973	Varroa dsRNA high	Parasitised- normal wings
Sample 72	DWV	26.222	Varroa dsRNA high	Parasitised- normal wings
Sample 72	NDUFA8	20.505	Varroa dsRNA high	Parasitised- normal wings
Sample 72	PROS54	22.477	Varroa dsRNA high	Parasitised- normal wings
Sample 73	DWV	29.732	Varroa dsRNA high	Non-parasitised
Sample 73	NDUFA8	22.815	Varroa dsRNA high	Non-parasitised
Sample 73	PROS54	23.893	Varroa dsRNA high	Non-parasitised
Sample 74	DWV	28.516	Varroa dsRNA high	Non-parasitised
Sample 74	NDUFA8	23.535	Varroa dsRNA high	Non-parasitised
Sample 74	PROS54	24.605	Varroa dsRNA high	Non-parasitised
Sample 75	DWV	11.691	Varroa dsRNA high	Parasitised- deformed wings
Sample 75	NDUFA8	24.96	Varroa dsRNA high	Parasitised- deformed wings
Sample 75	PROS54	25.504	Varroa dsRNA high	Parasitised- deformed wings
Sample 76	DWV	11.024	Varroa dsRNA high	Parasitised- deformed wings
Sample 76	NDUFA8	23.535	Varroa dsRNA high	Parasitised- deformed wings
Sample 76	PROS54	24.895	Varroa dsRNA high	Parasitised- deformed wings
Sample 77	DWV	8.558	Varroa dsRNA high	Parasitised- normal wings
Sample 77	NDUFA8	22.766	Varroa dsRNA high	Parasitised- normal wings
Sample 77	PROS54	24.155	Varroa dsRNA high	Parasitised- normal wings
Sample 78	DWV	26.911	Varroa dsRNA high	Parasitised- normal wings
Sample 78	NDUFA8	20.932	Varroa dsRNA high	Parasitised- normal wings
Sample 78	PROS54	22.903	Varroa dsRNA high	Parasitised- normal wings
Sample 79	DWV	24.885	Varroa dsRNA high	Non-parasitised
Sample 79	NDUFA8	21.572	Varroa dsRNA high	Non-parasitised
Sample 79	PROS54	23.41	Varroa dsRNA high	Non-parasitised
Sample 80	DWV	26.142	Varroa dsRNA high	Non-parasitised
Sample 80	NDUFA8	20.898	Varroa dsRNA high	Non-parasitised
Sample 80	PROS54	23.172	Varroa dsRNA high	Non-parasitised
Sample 81	DWV	7.652	Varroa dsRNA high	Parasitised- deformed wings
Sample 81	NDUFA8	20.942	Varroa dsRNA high	Parasitised- deformed wings
Sample 81	PROS54	23.041	Varroa dsRNA high	Parasitised- deformed wings
Sample 82	DWV	7.75	Varroa dsRNA high	Parasitised- deformed wings
Sample 82	NDUFA8	20.842	Varroa dsRNA high	Parasitised- deformed wings
Sample 82	PROS54	22.809	Varroa dsRNA high	Parasitised- deformed wings
Sample 83	DWV	12.383	Varroa dsRNA high	Parasitised- normal wings
Sample 83	NDUFA8	23.866	Varroa dsRNA high	Parasitised- normal wings
Sample 83	PROS54	25.169	Varroa dsRNA high	Parasitised- normal wings
Sample 84	DWV	8.343	Varroa dsRNA high	Parasitised- normal wings
Sample 84	NDUFA8	21.379	Varroa dsRNA high	Parasitised- normal wings
Sample 84	PROS54	23.323	Varroa dsRNA high	Parasitised- normal wings
Sample 85	DWV	18.752	Varroa dsRNA high	Non-parasitised
Sample 85	NDUFA8	18.963	Varroa dsRNA high	Non-parasitised
Sample 85	PROS54	21.914	Varroa dsRNA high	Non-parasitised
Sample 86	DWV	25.908	Varroa dsRNA high	Non-parasitised
Sample 86	NDUFA8	20.473	Varroa dsRNA high	Non-parasitised
Sample 86	PROS54	22.847	Varroa dsRNA high	Non-parasitised
Sample 87	DWV	8.183	Varroa dsRNA high	Parasitised- deformed wings
Sample 87	NDUFA8	19.992	Varroa dsRNA high	Parasitised- deformed wings
Sample 87	PROS54	22.247	Varroa dsRNA high	Parasitised- deformed wings
Sample 88	DWV	18.768	Varroa dsRNA high	Parasitised- deformed wings
Sample 88	NDUFA8	19.712	Varroa dsRNA high	Parasitised- deformed wings
Sample 88	PROS54	21.841	Varroa dsRNA high	Parasitised- deformed wings
Sample 89	DWV	19.693	DWV dsRNA	Parasitised- normal wings
Sample 89	NDUFA8	19.851	DWV dsRNA	Parasitised- normal wings
Sample 89	PROS54	22.286	DWV dsRNA	Parasitised- normal wings
Sample 90	DWV	30.147	DWV dsRNA	Parasitised- normal wings
Sample 90	NDUFA8	25.927	DWV dsRNA	Parasitised- normal wings
Sample 90	PROS54	27.619	DWV dsRNA	Parasitised- normal wings
Sample 91	DWV	30.236	DWV dsRNA	Non-parasitised
Sample 91	NDUFA8	20.8	DWV dsRNA	Non-parasitised
Sample 91	PROS54	23.18	DWV dsRNA	Non-parasitised
Sample 92	DWV	28.267	DWV dsRNA	Non-parasitised
Sample 92	NDUFA8	20.537	DWV dsRNA	Non-parasitised
Sample 92	PROS54	23.205	DWV dsRNA	Non-parasitised
Sample 93	DWV	7.581	DWV dsRNA	Parasitised- deformed wings
Sample 93	NDUFA8	20.729	DWV dsRNA	Parasitised- deformed wings
Sample 93	PROS54	23.122	DWV dsRNA	Parasitised- deformed wings
Sample 94	DWV	7.707	DWV dsRNA	Parasitised- deformed wings
Sample 94	NDUFA8	20.993	DWV dsRNA	Parasitised- deformed wings
Sample 94	PROS54	23.36	DWV dsRNA	Parasitised- deformed wings
Sample 95	DWV	8.208	DWV dsRNA	Parasitised- normal wings
Sample 95	NDUFA8	21.713	DWV dsRNA	Parasitised- normal wings
Sample 95	PROS54	23.486	DWV dsRNA	Parasitised- normal wings
Sample 96	DWV	9.685	DWV dsRNA	Parasitised- normal wings
Sample 96	NDUFA8	21.329	DWV dsRNA	Parasitised- normal wings
Sample 96	PROS54	23.232	DWV dsRNA	Parasitised- normal wings
Sample 97	DWV	25.863	DWV dsRNA	Non-parasitised
Sample 97	NDUFA8	22.443	DWV dsRNA	Non-parasitised
Sample 97	PROS54	23.995	DWV dsRNA	Non-parasitised
Sample 98	DWV	26.326	DWV dsRNA	Non-parasitised
Sample 98	NDUFA8	23.855	DWV dsRNA	Non-parasitised
Sample 98	PROS54	25.142	DWV dsRNA	Non-parasitised
Sample 99	DWV	19.317	DWV dsRNA	Parasitised- deformed wings
Sample 99	NDUFA8	19.475	DWV dsRNA	Parasitised- deformed wings
Sample 99	PROS54	21.77	DWV dsRNA	Parasitised- deformed wings
Sample 100	DWV	7.647	DWV dsRNA	Parasitised- deformed wings
Sample 100	NDUFA8	19.901	DWV dsRNA	Parasitised- deformed wings
Sample 100	PROS54	22.219	DWV dsRNA	Parasitised- deformed wings
Sample 101	DWV	21.681	DWV dsRNA	Parasitised- normal wings
Sample 101	NDUFA8	19.941	DWV dsRNA	Parasitised- normal wings
Sample 101	PROS54	22.772	DWV dsRNA	Parasitised- normal wings
Sample 102	DWV	22.779	DWV dsRNA	Parasitised- normal wings
Sample 102	NDUFA8	18.489	DWV dsRNA	Parasitised- normal wings
Sample 102	PROS54	22.223	DWV dsRNA	Parasitised- normal wings
Sample 103	DWV	26.994	DWV dsRNA	Non-parasitised
Sample 103	NDUFA8	20.052	DWV dsRNA	Non-parasitised
Sample 103	PROS54	22.929	DWV dsRNA	Non-parasitised
Sample 104	DWV	26.811	DWV dsRNA	Non-parasitised
Sample 104	NDUFA8	19.164	DWV dsRNA	Non-parasitised
Sample 104	PROS54	22.471	DWV dsRNA	Non-parasitised
Sample 105	DWV	26.665	DWV dsRNA	Parasitised- deformed wings
Sample 105	NDUFA8	19.941	DWV dsRNA	Parasitised- deformed wings
Sample 105	PROS54	22.502	DWV dsRNA	Parasitised- deformed wings
Sample 106	DWV	16.343	DWV dsRNA	Parasitised- deformed wings
Sample 106	NDUFA8	19.222	DWV dsRNA	Parasitised- deformed wings
Sample 106	PROS54	22.553	DWV dsRNA	Parasitised- deformed wings
Sample 107	DWV	24.27	DWV dsRNA	Parasitised- normal wings
Sample 107	NDUFA8	21.19	DWV dsRNA	Parasitised- normal wings
Sample 107	PROS54	23.865	DWV dsRNA	Parasitised- normal wings
Sample 108	DWV	23.615	DWV dsRNA	Parasitised- normal wings
Sample 108	NDUFA8	18.608	DWV dsRNA	Parasitised- normal wings
Sample 108	PROS54	21.576	DWV dsRNA	Parasitised- normal wings
Sample 109	DWV	28.763	DWV dsRNA	Non-parasitised
Sample 109	NDUFA8	20.124	DWV dsRNA	Non-parasitised
Sample 109	PROS54	22.354	DWV dsRNA	Non-parasitised
Sample 110	DWV	30.024	DWV dsRNA	Non-parasitised
Sample 110	NDUFA8	19.328	DWV dsRNA	Non-parasitised
Sample 110	PROS54	22.348	DWV dsRNA	Non-parasitised
Sample 111	DWV	21.321	DWV dsRNA	Parasitised- deformed wings
Sample 111	NDUFA8	21.53	DWV dsRNA	Parasitised- deformed wings
Sample 111	PROS54	23.631	DWV dsRNA	Parasitised- deformed wings
Sample 112	DWV	21.525	DWV dsRNA	Parasitised- deformed wings
Sample 112	NDUFA8	19.371	DWV dsRNA	Parasitised- deformed wings
Sample 112	PROS54	21.948	DWV dsRNA	Parasitised- deformed wings
Sample 113	DWV	25.827	DWV dsRNA	Parasitised- normal wings
Sample 113	NDUFA8	20.354	DWV dsRNA	Parasitised- normal wings
Sample 113	PROS54	22.989	DWV dsRNA	Parasitised- normal wings
Sample 114	DWV	27.678	DWV dsRNA	Parasitised- normal wings
Sample 114	NDUFA8	21.663	DWV dsRNA	Parasitised- normal wings
Sample 114	PROS54	23.933	DWV dsRNA	Parasitised- normal wings
Sample 115	DWV	32.194	DWV dsRNA	Non-parasitised
Sample 115	NDUFA8	19.891	DWV dsRNA	Non-parasitised
Sample 115	PROS54	22.824	DWV dsRNA	Non-parasitised
Sample 116	DWV	28.467	DWV dsRNA	Non-parasitised
Sample 116	NDUFA8	18.436	DWV dsRNA	Non-parasitised
Sample 116	PROS54	21.845	DWV dsRNA	Non-parasitised
Sample 117	DWV	7.879	DWV dsRNA	Parasitised- deformed wings
Sample 117	NDUFA8	19.375	DWV dsRNA	Parasitised- deformed wings
Sample 117	PROS54	22.831	DWV dsRNA	Parasitised- deformed wings
Sample 118	DWV	8.351	DWV dsRNA	Parasitised- deformed wings
Sample 118	NDUFA8	19.041	DWV dsRNA	Parasitised- deformed wings
Sample 118	PROS54	22.614	DWV dsRNA	Parasitised- deformed wings
Sample 119	DWV	28.057	dsRNA control	Non-parasitised
Sample 119	NDUFA8	22.397	dsRNA control	Non-parasitised
Sample 119	PROS54	23.441	dsRNA control	Non-parasitised
Sample 120	DWV	31.099	dsRNA control	Non-parasitised
Sample 120	NDUFA8	22.066	dsRNA control	Non-parasitised
Sample 120	PROS54	23.046	dsRNA control	Non-parasitised
Sample 121	DWV	-	dsRNA control	Parasitised- normal wings
Sample 121	NDUFA8	21.488	dsRNA control	Parasitised- normal wings
Sample 121	PROS54	23.086	dsRNA control	Parasitised- normal wings
Sample 122	DWV	27.342	dsRNA control	Parasitised- normal wings
Sample 122	NDUFA8	21.198	dsRNA control	Parasitised- normal wings
Sample 122	PROS54	23.404	dsRNA control	Parasitised- normal wings
Sample 123	DWV	30.706	Control sugar	Parasitised- normal wings
Sample 123	NDUFA8	20.808	Control sugar	Parasitised- normal wings
Sample 123	PROS54	22.863	Control sugar	Parasitised- normal wings
Sample 124	DWV	33.724	Control sugar	Parasitised- normal wings
Sample 124	NDUFA8	20.733	Control sugar	Parasitised- normal wings
Sample 124	PROS54	23.11	Control sugar	Parasitised- normal wings
Sample 125	DWV	10.694	Control sugar	Parasitised- normal wings
Sample 125	NDUFA8	21.399	Control sugar	Parasitised- normal wings
Sample 125	PROS54	23.213	Control sugar	Parasitised- normal wings
Sample 126	DWV	24.737	Control sugar	Parasitised- normal wings
Sample 126	NDUFA8	22.014	Control sugar	Parasitised- normal wings
Sample 126	PROS54	22.835	Control sugar	Parasitised- normal wings
Sample 127	DWV	24.891	Control sugar	Parasitised- normal wings
Sample 127	NDUFA8	22.418	Control sugar	Parasitised- normal wings
Sample 127	PROS54	23.08	Control sugar	Parasitised- normal wings
Sample 128	DWV	27.059	Control sugar	Parasitised- normal wings
Sample 128	NDUFA8	22.295	Control sugar	Parasitised- normal wings
Sample 128	PROS54	23.188	Control sugar	Parasitised- normal wings
Sample 129	DWV	27.43	Varroa dsRNA low	Non-parasitised
Sample 129	NDUFA8	21.539	Varroa dsRNA low	Non-parasitised
Sample 129	PROS54	22.719	Varroa dsRNA low	Non-parasitised
Sample 130	DWV	28.293	Varroa dsRNA low	Non-parasitised
Sample 130	NDUFA8	22.17	Varroa dsRNA low	Non-parasitised
Sample 130	PROS54	22.729	Varroa dsRNA low	Non-parasitised
Sample 131	DWV	8.892362595	dsRNA control	Parasitised- normal wings
Sample 131	NDUFA8	22.86531067	dsRNA control	Parasitised- normal wings
Sample 131	PROS54	24.9395256	dsRNA control	Parasitised- normal wings
Sample 132	DWV	27.42793083	dsRNA control	Non-parasitised
Sample 132	NDUFA8	21.85876274	dsRNA control	Non-parasitised
Sample 132	PROS54	23.86180687	dsRNA control	Non-parasitised
