# Supplementary material for: Effects of Deformed Wing Virus-Targeting dsRNA on Viral Loads in Bees Parasitised and Non-Parasitised by Varroa destructor
Source: Viruses. 2023 Nov 15;15(11):2259. doi: 10.3390/v15112259 (PMC10674661; doi:10.3390/v15112259)
Supplement: Supplementary file 1 [file viruses-15-02259-s001.zip › TableS2.csv]

Gene ID	Gene annotation	Associated pathway	Literature
			Reference	Homolog identified by literature	Varroa destructor protein
LOC111252299	endoribonuclease Dicer-like	miRNA	Nganso et al. 2020	Dicer-1 (S. scabeie)	XP_022665643.1
LOC111243637	endoribonuclease Dicer-like	siRNA	Nganso et al. 2020	Dicer-2 (I. scapularis)	XP_022645213.1, XP_022645209.1
LOC111252017	endoribonuclease Dicer-like	siRNA	Mondet et al. 2018	Dicer_2
LOC111242933	endoribonuclease Dicer-like	siRNA	Mondet et al. 2018	Dicer_2
LOC111254449	ribonuclease 3-like isoform	miRNA	Nganso et al. 2020	Drosha (D. melanogaster)	XP_022671054.1
LOC111252768	microprocessor complex subunit DGCR8-like	miRNA	Nganso et al. 2020, Mondet et al. 2018	Pasha (P. ovis)	XP_022666907.1,XP_022666908.1,XP_022666909.1
LOC111246156	exportin-1-like	miRNA	Nganso et al. 2020	Exportin-1 (P. ovis)	XP_022651011.1
LOC111246157	exportin-2-like	miRNA	Nganso et al. 2020	Exportin-2 (P. ovis)	XP_022651014.1
LOC111246742	exportin-5-like isoform X1	miRNA	Nganso et al. 2020	Exportin-5 (S. scabiei)	XP_022652580.1
LOC111253655	RISC-loading complex subunit tarbp2-like	miRNA	Nganso et al. 2020	Loquacious (P. ovis)	XP_022669107.1
LOC111246722	putative helicase MOV-10	RISC assembly	Mondet et al. 2018
LOC111252490	probable ATP-dependent RNA helicase DDX5	RISC assembly	Mondet et al. 2018
LOC111252277	plasminogen activator inhibitor 1 RNA-binding protein-like	RISC assembly	Nganso et al. 2020; Mondet et al. 2018	Vig_1 (P.ovis)	XP_022665583.1
LOC111253573	staphylococcal nuclease domain-containing protein 1-like	RISC assembly	Nganso et al. 2020; Mondet et al. 2019	tsn_1 (P. ovis)	XP_022668923.1
LOC111247833	argonaute-2-like	miRNA	Nganso et al. 2020	Argonaute-1 (P. ovis)	XP_022655006.1
LOC111252134	argonaute-2-like	siRNA	Nganso et al. 2020	Argonaute-2 (M. occidentalis)	XP_022665357.1
LOC111254624	argonaute-3-like	siRNA	Nganso et al. 2020	Argonaute-2 (M. occidentalis)	XP_022671411.1
LOC111245813	argonaute-4-like	siRNA	Nganso et al. 2020	Argonaute-2 (M. occidentalis)	XP_022650384.1
LOC111243938	argonaute-2-like	siRNA	Nganso et al. 2020	Argonaute-2 (M. occidentalis)	XP_022646042.1
LOC111255253	argonaute 12-like	siRNA	Nganso et al. 2020	Argonaute-2 (M. occidentalis)	XP_022672750.1
LOC111255312	argonaute 12-like	siRNA
LOC111253765	piwi-like protein 1	piwi	Nganso et al. 2020	Argonaute-3 (D. melanogaster)	XP_022669446.1
LOC111248399	LIM homeobox transcription factor 1-beta-like	piwi	Nganso et al. 2020	Sago_1 (C.elegans)	XP_022656418.1,XP_022656426.1,XP_022656437.1
LOC111249053	uncharacterized protein LOC111249053	systemic RNAi	Nganso et al. 2020	RdRP (P. ovis)	XP_022658093.1
LOC111252784	probable RNA-dependent RNA polymerase 1	systemic RNAi	Nganso et al. 2020	RdRP (P. ovis)	XP_022666953.1, XP_022666954.1
LOC111244709	probable RNA-dependent RNA polymerase 1	systemic RNAi	Mondet et al. 2018, Nganso et al. 2020	RdRP (P. ovis)	XP_022647785.1
LOC111250766	clathrin interactor 1-like	systemic RNAi	Mondet et al. 2018	clathrin
LOC111247683	lysosome membrane protein 2	systemic RNAi	Aung et al. 2011
LOC111247934	epsin-2-like	dsRNA uptake/transport	Nganso et al. 2020	Rsd-3 (P. ovis)	XP_022655248.1
LOC111252611	clathrin heavy chain 1-like	dsRNA uptake/transport	Mondet et al. 2018	clathrin
LOC111248436	protein draper-like	dsRNA uptake/transport	Nganso et al. 2020	Eater (D. melanogaster)	XP_022656525.1
LOC111246243	AP-2 complex subunit mu	dsRNA uptake/transport	Mondet et al. 2018
LOC111247540	ADP-ribosylation factor-like protein 1	dsRNA uptake/transport	Mondet et al. 2018
LOC111246955	conserved oligomeric Golgi complex subunit 2-like	dsRNA uptake/transport	Mondet et al. 2018
LOC111243618	conserved oligomeric Golgi complex subunit 3-like	dsRNA uptake/transport	Mondet et al. 2018
LOC111249999	trafficking protein particle complex subunit 3-like	dsRNA uptake/transport	Mondet et al. 2018
LOC111253341	V-type proton ATPase subunit H-like	dsRNA uptake/transport	Mondet et al. 2018
LOC111244135	vacuolar protein sorting-associated protein 41 homolog	dsRNA uptake/transport	Mondet et al. 2018
LOC111254625	phosphatidylinositol 3-kinase catalytic subunit type 3-like	dsRNA uptake/transport	Mondet et al. 2018
LOC111248934	E3 ubiquitin-protein ligase HUWE1-like	dsRNA uptake/transport	Mondet et al. 2018
LOC111249779	E3 ubiquitin-protein ligase HUWE1-like	dsRNA uptake/transport	Mondet et al. 2018
LOC111246884	beta-1,4-mannosyltransferase egh-like	dsRNA uptake/transport	Mondet et al. 2018
