# Supplementary material for: Effects of Deformed Wing Virus-Targeting dsRNA on Viral Loads in Bees Parasitised and Non-Parasitised by Varroa destructor
Source: Viruses. 2023 Nov 15;15(11):2259. doi: 10.3390/v15112259 (PMC10674661; doi:10.3390/v15112259)
Supplement: Supplementary file 1 [file viruses-15-02259-s001.zip › TableS3.csv]

Name	Description	Country
AB070959.1	Kakugo virus genomic RNA, complete genome	Japan
AY292384.1	Deformed wing virus isolate PA, complete genome	USA
DWV_TRINITY_DN369_c1_g1_i12	Deformed wing virus-A NZ, partial polyprotein sequence	New Zealand
GU109335.1	Deformed wing virus isolate Warwick-2009 polyprotein gene, complete cds	UK
JQ413340.1	Deformed wing virus isolate Chilensis A1, complete genome	Chile
JX878304.1	Deformed wing virus strain Korea-1, complete genome	South Korea
JX878305.1	Deformed wing virus strain Korea-2, complete genome	South Korea
KT004425.1	Deformed wing virus isolate AmE711 polyprotein gene, complete cds	USA
KU847397.1	Deformed wing virus isolate Austria 1414, complete genome	Austria
KX373899.2	Deformed wing virus isolate 85-DWV, complete genome	France
KY909333.1	Deformed wing virus isolate Vespa_crabro_DWV_PI_2016, complete genome	Italy
MF036686.1	Deformed wing virus isolate 2C1, complete genome	China
MF623172.1	Deformed wing virus isolate Hamilton polyprotein gene, complete cds	New Zealand
MG831202.1	Deformed wing virus isolate Maryland/2015/422, complete genome	USA
MG831203.1	Deformed wing virus isolate Maryland/2015/702, complete genome	USA
MG831204.1	Deformed wing virus isolate Maryland/2015/703, complete genome	USA
MH069503.1	Deformed wing virus isolate DWV-USA-p16 polyprotein gene, complete cds	USA
MH069505.1	Deformed wing virus isolate DWV-USA-p18 polyprotein gene, complete cds	USA
MH069506.1	Deformed wing virus isolate DWV-USA-p119 polyprotein gene, complete cds	USA
MH069507.1	Deformed wing virus isolate DWV-USA-p123 polyprotein gene, complete cds	USA
MH267695.1	Deformed wing virus isolate DWV_MR, complete genome	Sweden
MH267696.1	Deformed wing virus isolate DWV_MS, complete genome	Sweden
MN538208.1	Deformed wing virus isolate DWV_A_New_Zealand, complete genome	New Zealand
MN746311.1	Deformed wing virus isolate VIVA-b2b, complete genome	Sweden
MT096518.1	Deformed wing virus isolate FTA1-4, complete genome	Spain
MT096529.1	Deformed wing virus isolate FTA2-7, complete genome	Spain
MT636322.1	Deformed wing virus isolate DWV-MS-APR15, complete genome	Sweden
MT636323.1	Deformed wing virus isolate DWV-MS-JUN15, complete genome	Sweden
MT636324.1	Deformed wing virus isolate DWV-MS-AUG15, complete genome	Sweden
MT636325.1	Deformed wing virus isolate DWV-MS-SEP15, complete genome	Sweden
MT636326.1	Deformed wing virus isolate DWV-MS-OCT15, complete genome	Sweden
MT940255.1	Deformed wing virus isolate A, complete genome	USA
MW222481.1	Deformed wing virus isolate MeDWV-1, complete genome	USA
MW265929.1	Deformed wing virus isolate DWV-Syria, complete genome	Syria
MZ821822.1	Deformed wing virus isolate DWV_No6_AM-LN-2017-11 polyprotein gene, complete cds	China
MZ821823.1	Deformed wing virus isolate DWV_No7_Am007-BJ2019 polyprotein gene, complete cds	China
MZ821839.1	Deformed wing virus isolate DWV_No23_Mi008-HB2018-9 polyprotein gene, complete cds	China
MZ867713.1	Deformed wing virus A isolate Antrim polyprotein gene, complete cds	Ireland
MZ867714.1	Deformed wing virus A isolate Kilkenny polyprotein gene, complete cds	Ireland
MZ867715.1	Deformed wing virus A isolate Tipperary polyprotein gene, complete cds	Ireland
NC_004830.2	Deformed wing virus, complete genome	Italy
OL803822.1	Deformed wing virus strain DWV-A8C polyprotein gene, complete cds	Czech Republic
OL803823.1	Deformed wing virus strain DWV-A9A polyprotein gene, complete cds	Czech Republic
OL803824.1	Deformed wing virus strain DWV-A9C polyprotein gene, complete cds	Czech Republic
OL803825.1	Deformed wing virus strain DWV-A12C polyprotein gene, complete cds	Czech Republic
ON648743.1	MAG: Deformed wing virus isolate DWV LS13/2018, complete genome	Slovenia
ON648742.1	MAG: Deformed wing virus isolate DWV 341-2/2019, complete genome	Slovenia
OR361524.1	Deformed wing virus A isolate DWV-A-MI-JUN2018-EVR10, complete genome	USA
OR361526.1	Deformed wing virus A isolate DWV-A-OR-JUN2018-EVR13, complete genome	USA
OR361530.1	Deformed wing virus A isolate DWV-A-ND-OCT2018-EVR17, complete genome	USA
OR361536.1	Deformed wing virus A isolate DWV-A-OR-OCT2018-EVR23, complete genome	USA
