# Supplementary material for: Effects of Deformed Wing Virus-Targeting dsRNA on Viral Loads in Bees Parasitised and Non-Parasitised by Varroa destructor
Source: Viruses. 2023 Nov 15;15(11):2259. doi: 10.3390/v15112259 (PMC10674661; doi:10.3390/v15112259)
Supplement: Supplementary file 1 [file viruses-15-02259-s001.zip › TableS4.csv]

	LOC	product	stat	p.val
Kruskal-Wallis chi-squared	LOC111242933	endoribonuclease Dicer-like	0.18478260869565	0.911748308655649
Kruskal-Wallis chi-squared1	LOC111243618	conserved oligomeric Golgi complex subunit 3-like	0.853801169590646	0.65252842024987
Kruskal-Wallis chi-squared2	LOC111243637	endoribonuclease Dicer-like	1.0899689762151	0.579850777852988
Kruskal-Wallis chi-squared3	LOC111243938	argonaute-2-like	0.736842105263158	0.691825825270517
Kruskal-Wallis chi-squared4	LOC111244135	vacuolar protein sorting-associated protein 41 homolog	0.888888888888886	0.641180388429956
Kruskal-Wallis chi-squared5	LOC111244709	probable RNA-dependent RNA polymerase 1	0.57309941520468	0.750849754662436
Kruskal-Wallis chi-squared6	LOC111245813	argonaute-4-like	0.0818713450292421	0.959890875328063
Kruskal-Wallis chi-squared7	LOC111246156	exportin-1-like	0.456140350877192	0.796068393426591
Kruskal-Wallis chi-squared8	LOC111246157	exportin-2-like	2.55526859504132	0.278695832622692
Kruskal-Wallis chi-squared9	LOC111246243	AP-2 complex subunit mu	0.71418732782369	0.699706957374503
Kruskal-Wallis chi-squared10	LOC111246722	putative helicase MOV-10	2.16890495867768	0.338086844761086
Kruskal-Wallis chi-squared11	LOC111246742	exportin-5-like	3.65581955922865	0.160749218154102
Kruskal-Wallis chi-squared12	LOC111246884	beta-1,4-mannosyltransferase egh-like	0.178546831955921	0.914595474369388
Kruskal-Wallis chi-squared13	LOC111246955	conserved oligomeric Golgi complex subunit 2-like	0.877192982456137	0.644940966469783
Kruskal-Wallis chi-squared14	LOC111247540	ADP-ribosylation factor-like protein 1	1.00396005509642	0.605330900467719
Kruskal-Wallis chi-squared15	LOC111247833	argonaute-2-like	0.502923976608187	0.777663017338089
Kruskal-Wallis chi-squared16	LOC111247934	epsin-2-like	0.362573099415208	0.834196285742519
Kruskal-Wallis chi-squared17	LOC111248399	LIM homeobox transcription factor 1-beta-like	0.245867768595041	0.884322128206775
Kruskal-Wallis chi-squared18	LOC111248436	protein draper-like	1.50877192982456	0.470299306363909
Kruskal-Wallis chi-squared19	LOC111249053	uncharacterized protein LOC111249053	0.456140350877192	0.796068393426591
Kruskal-Wallis chi-squared20	LOC111249779	E3 ubiquitin-protein ligase HUWE1-like	0.888888888888886	0.641180388429956
Kruskal-Wallis chi-squared21	LOC111249999	trafficking protein particle complex subunit 3-like	1.45029239766082	0.484253766445591
Kruskal-Wallis chi-squared22	LOC111250766	clathrin interactor 1-like	0.456140350877192	0.796068393426591
Kruskal-Wallis chi-squared23	LOC111252017	endoribonuclease Dicer-like	0.43026859504132	0.806433130934596
Kruskal-Wallis chi-squared24	LOC111252277	plasminogen activator inhibitor 1 RNA-binding protein-like	1.2046783625731	0.547529366500244
Kruskal-Wallis chi-squared25	LOC111252299	endoribonuclease Dicer-like	1.55555555555556	0.459425824035926
Kruskal-Wallis chi-squared26	LOC111252490	probable ATP-dependent RNA helicase DDX5	0.272210743801654	0.872750664246931
Kruskal-Wallis chi-squared27	LOC111252611	clathrin heavy chain 1-like	3.92982456140351	0.140168181531077
Kruskal-Wallis chi-squared28	LOC111252768	microprocessor complex subunit DGCR8-like	1.29824561403509	0.522503912560289
Kruskal-Wallis chi-squared29	LOC111252784	probable RNA-dependent RNA polymerase 1	0.800724637681161	0.670077220446541
Kruskal-Wallis chi-squared30	LOC111253341	V-type proton ATPase subunit H-like	2.46783625730994	0.291149578427927
Kruskal-Wallis chi-squared31	LOC111253573	staphylococcal nuclease domain-containing protein 1-like	3.79338842975207	0.150063879099415
Kruskal-Wallis chi-squared32	LOC111253655	RISC-loading complex subunit tarbp2-like	2.71332644628099	0.257518627126192
Kruskal-Wallis chi-squared33	LOC111253765	piwi-like protein 1	1.32592975206612	0.515321203802198
Kruskal-Wallis chi-squared34	LOC111254449	ribonuclease 3-like isoform	2.23329889807163	0.327374845190439
Kruskal-Wallis chi-squared35	LOC111254624	argonaute-3-like	0.736842105263158	0.691825825270517
Kruskal-Wallis chi-squared36	LOC111254625	phosphatidylinositol 3-kinase catalytic subunit type 3-like	4.67836257309941	0.0964065352561684
Kruskal-Wallis chi-squared37	LOC111255253	argonaute 12-like	0.853801169590646	0.65252842024987
Kruskal-Wallis chi-squared38	LOC111255312	argonaute 12-like	3.19298245614035	0.202606171107112
